# Supplementary material
Source: PubMed Central journal article supplement (PMC8111790)

# Supplementary figure 1

figure 4

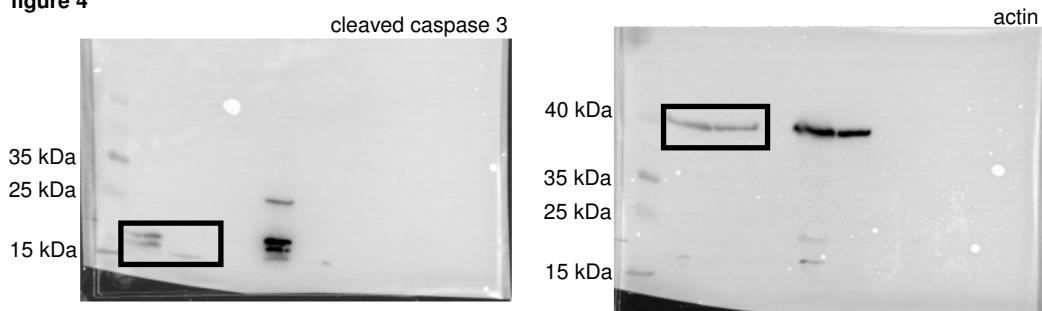

extended data figure 6

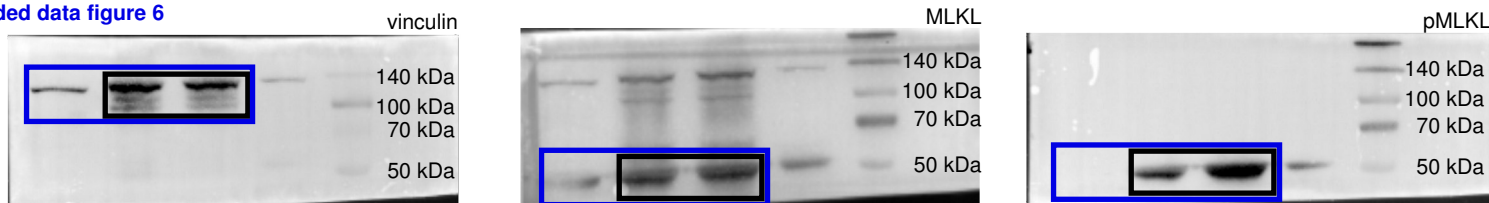

extended data figure 6

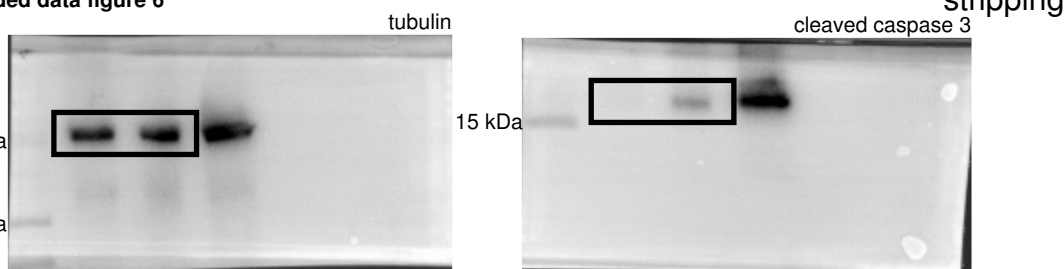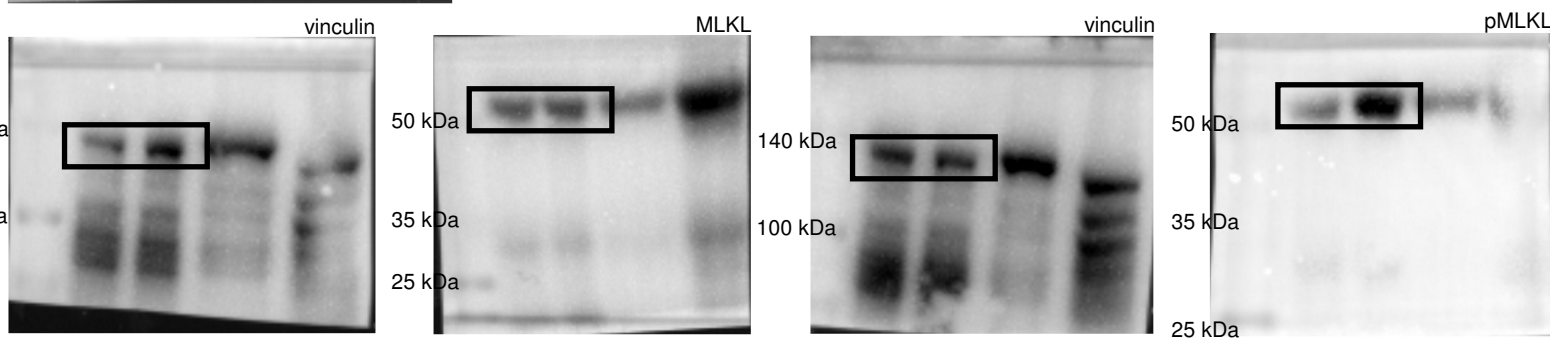

extended data figure 6

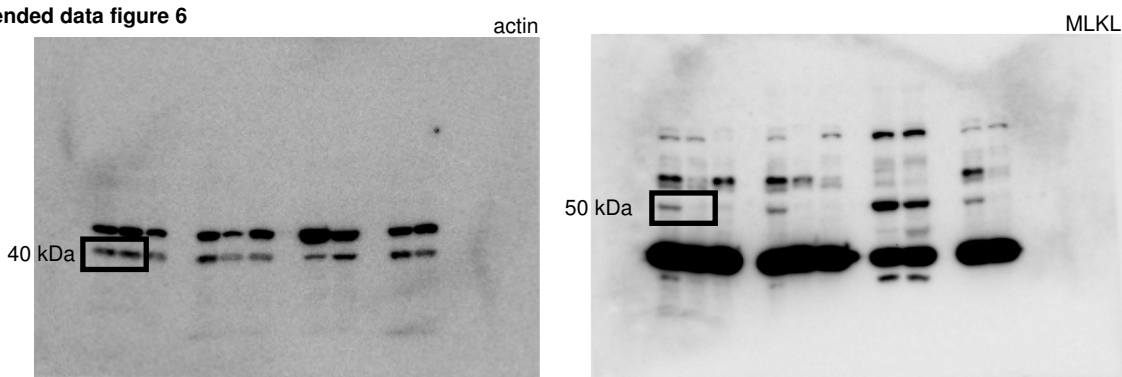

extended data figure 7

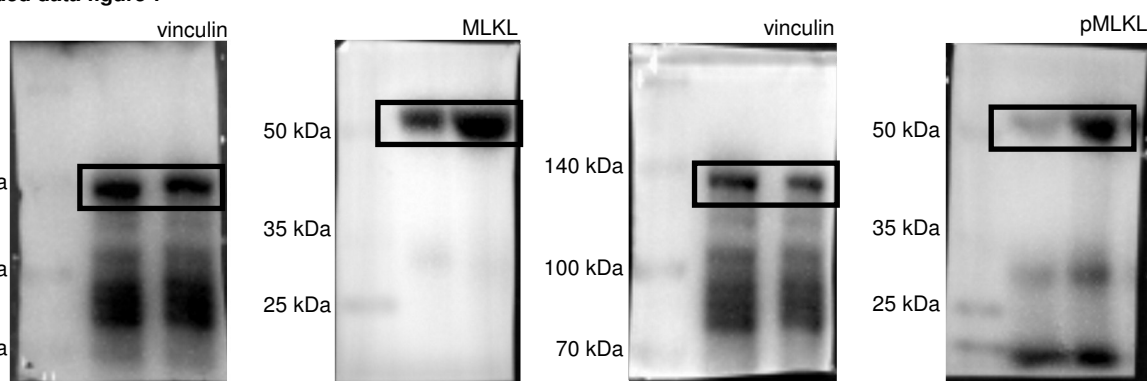

## Supplementary Figure 2: Ext. Data Fig. 4e

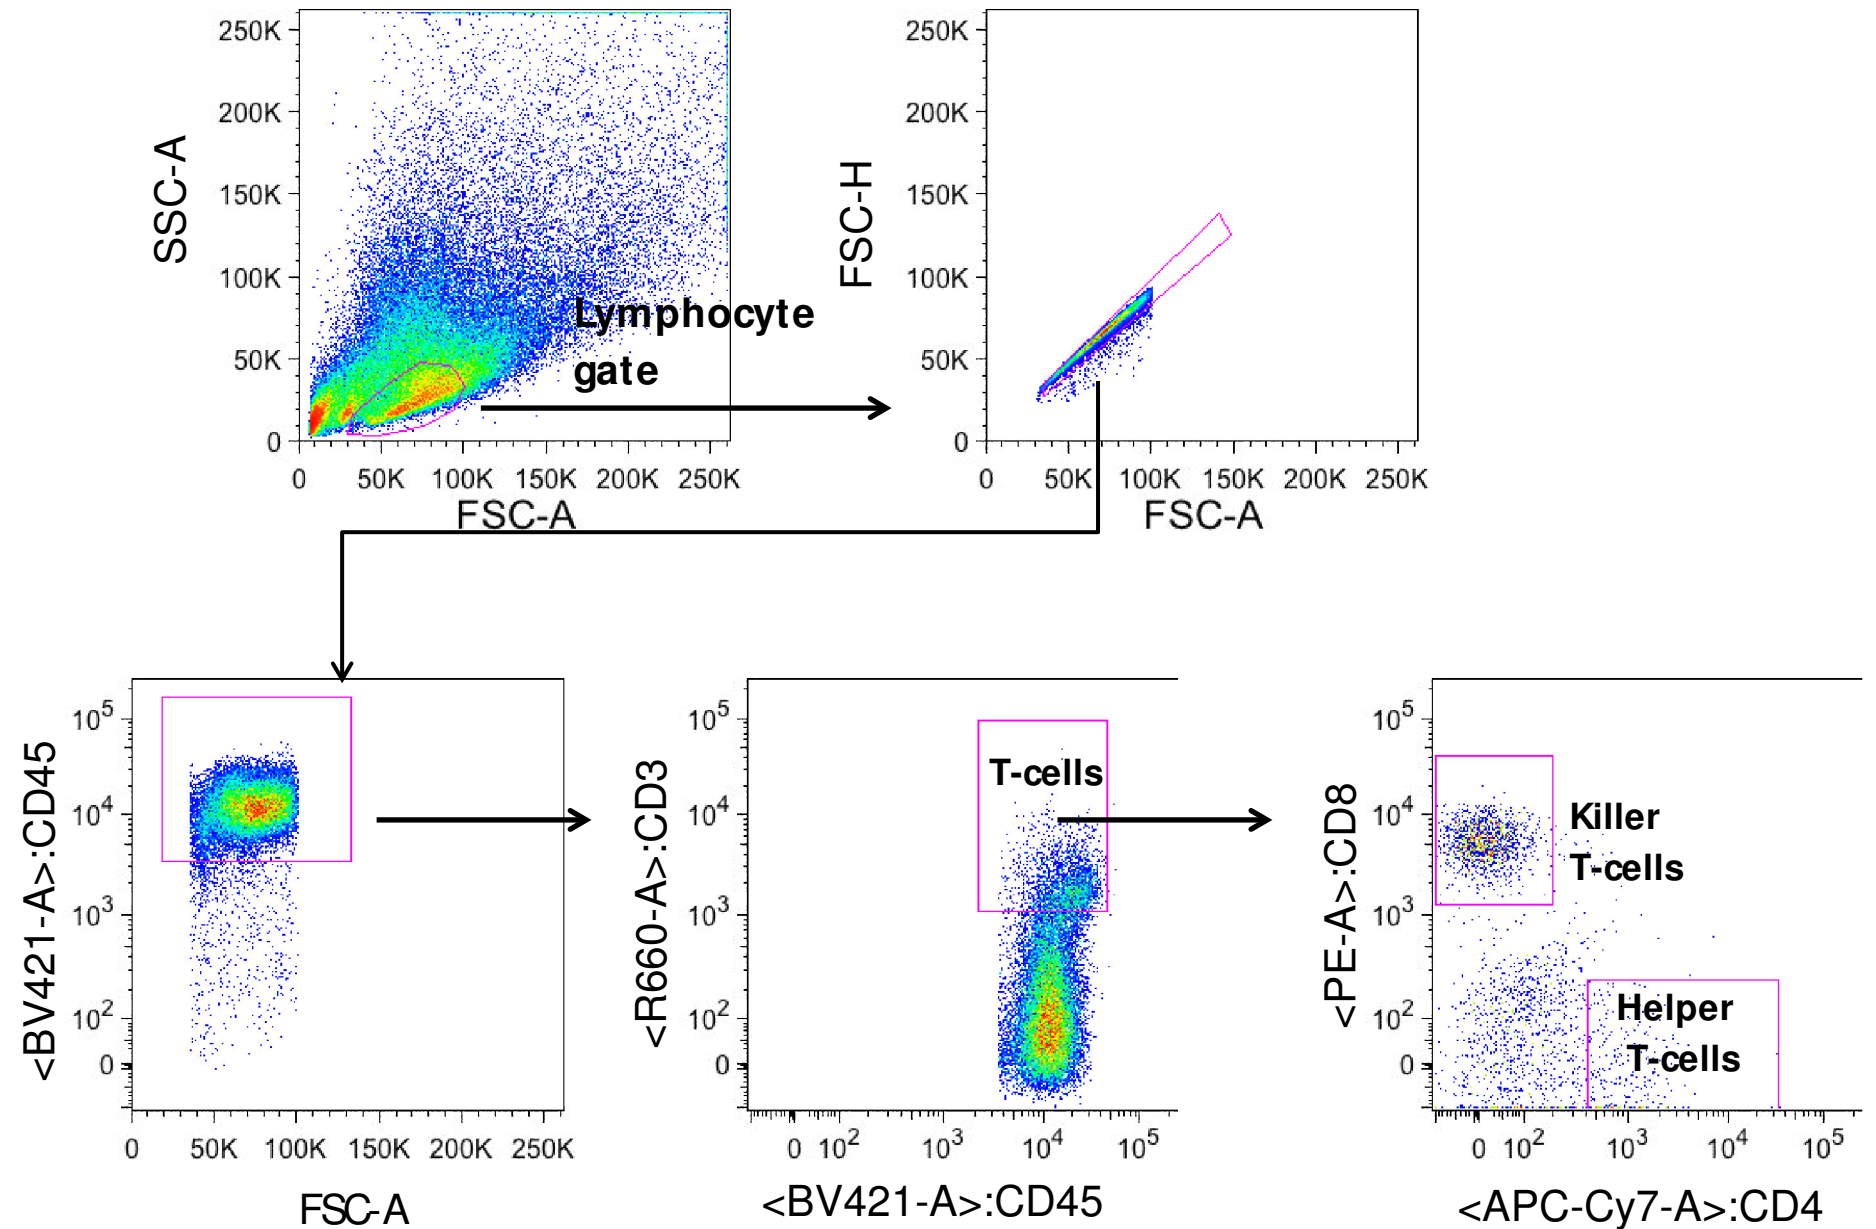

# Supplementary Figure 2: Ext. Data Fig. 4f

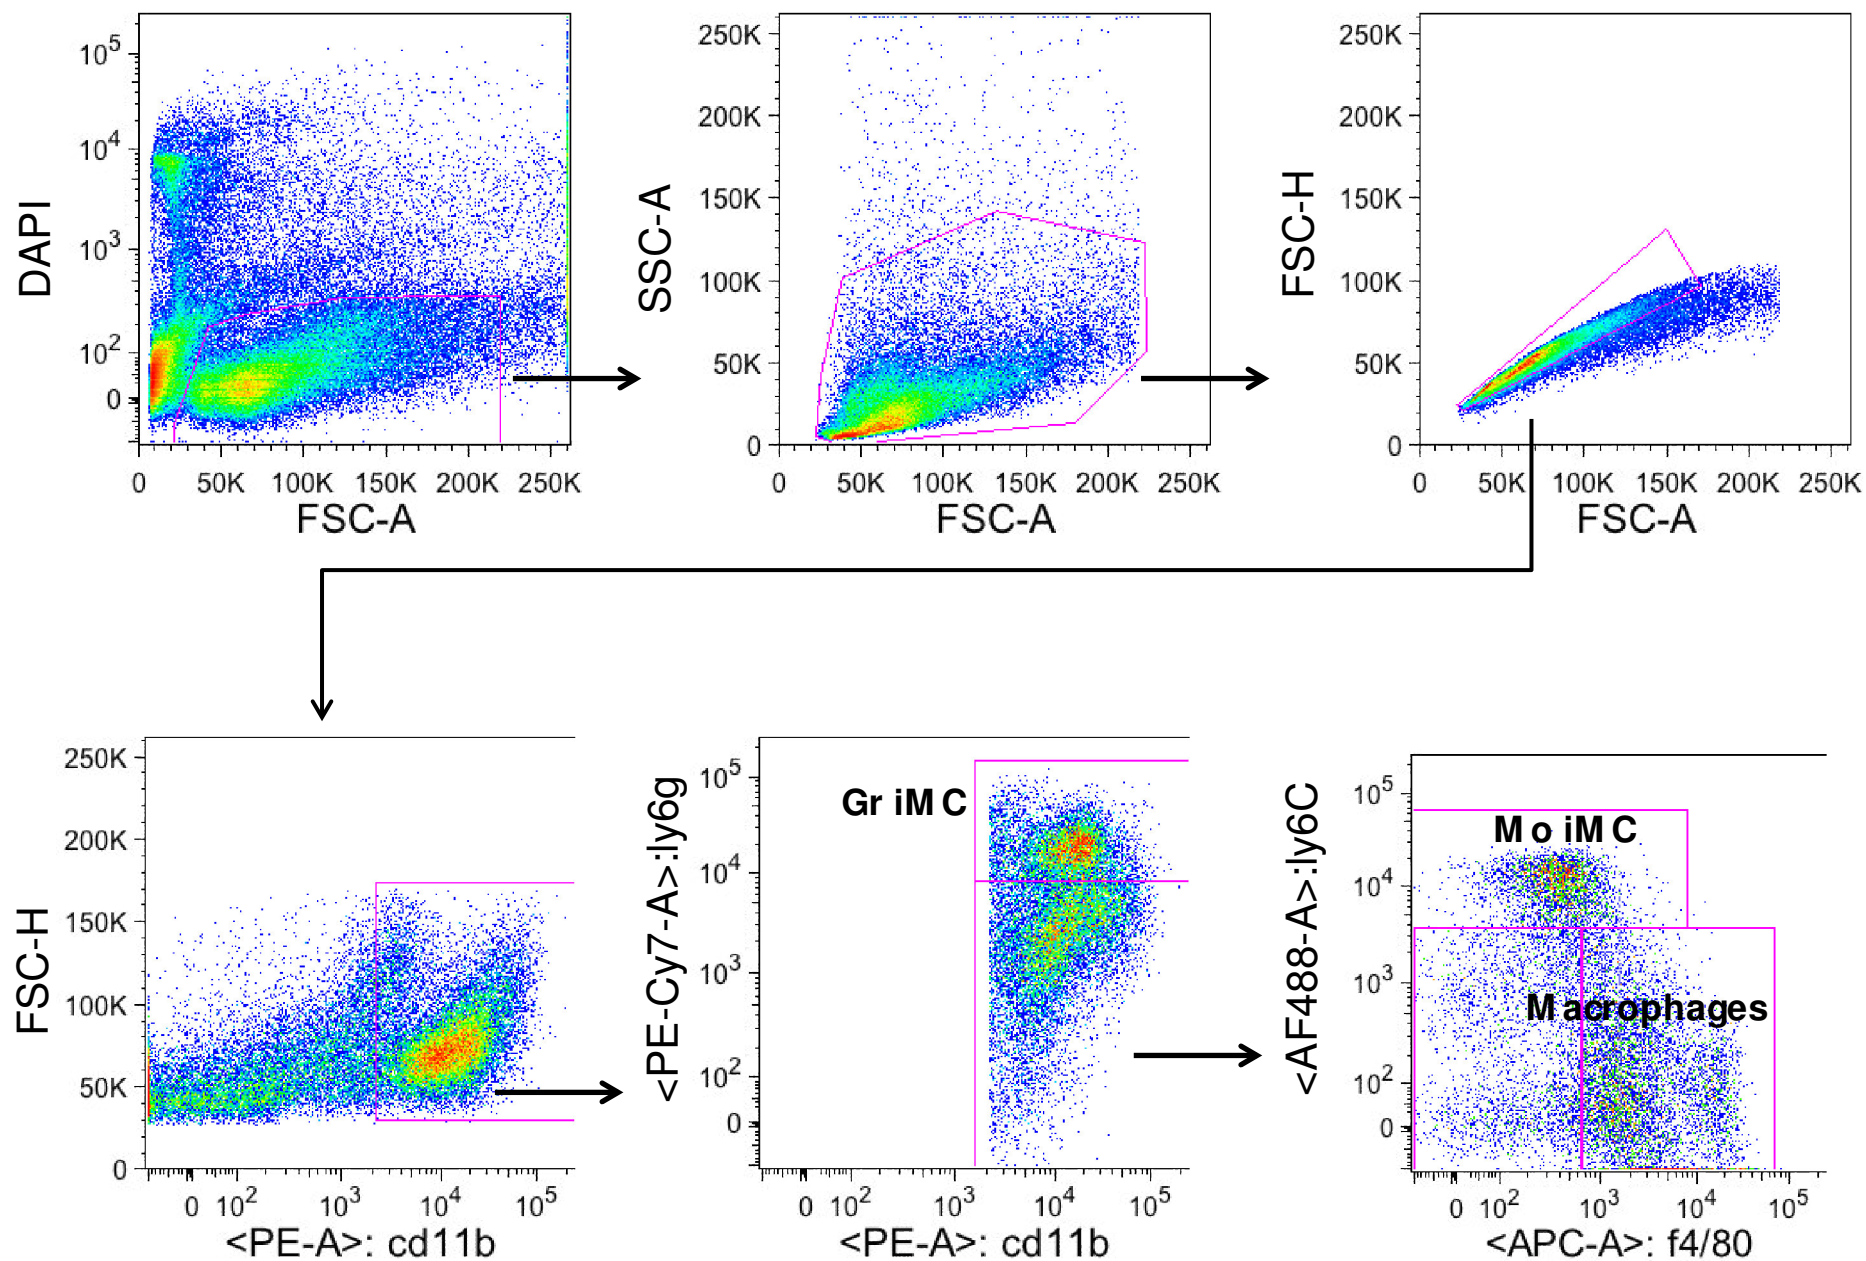

Supplement: NIHMS1691524-supplement-Supple_figures_1_2.pdf [file NIHMS1691524-supplement-Supple_figures_1_2.pdf]
